# Supplementary material for: Structural basis for the inability of chloramphenicol to inhibit peptide bond formation in the presence of A-site glycine
Source: PubMed Central journal article supplement — Nucleic Acids Res. 2022 Jun 29;50(13):7669–79. doi: 10.1093/nar/gkac548 (PMC9303264; doi:10.1093/nar/gkac548), 2022-06-29
Supplement: gkac548_supplemental_file.pdf [file gkac548_supplemental_file.pdf]

## Supplementary Information for

# **Structural basis for the inability of chloramphenicol to inhibit peptide bond formation in the presence of A-site glycine.**

Egor A. Syroegin<sup>1,\*</sup>, Elena V. Aleksandrova<sup>1,\*</sup>, and Yury S. Polikanov<sup>1,2,3,#</sup>

<sup>1</sup> Department of Biological Sciences, University of Illinois at Chicago, Chicago, IL 60607, USA

<sup>2</sup> Department of Pharmaceutical Sciences, University of Illinois at Chicago, Chicago, IL 60607, USA

<sup>3</sup> Center for Biomolecular Sciences, University of Illinois at Chicago, Chicago, IL 60607, USA

\* Authors contributed equally to this work

# To whom correspondence should be addressed:

E-mail: [yuryp@uic.edu](mailto:yuryp@uic.edu) (Y.S.P.)

### **This file includes:**

- I. Supplementary Table 1;
- II. Supplementary Figures 1 to 3 with legends;
- III. Supplementary References.

## II. SUPPLEMENTARY TABLES

Table S1. X-ray data collection and refinement statistics.

| <b>Crystals</b>                                                        | 70S ribosome complex with<br>A-site Gly-tRNA <sup>Gly</sup> , and<br>P-site fMet-tRNA <sup>Met</sup><br>PDB entry 7U2H | 70S ribosome complex with<br>A-site Gly-tRNA <sup>Gly</sup> , P-site<br>fMet-tRNA <sup>Met</sup> , and CHL<br>PDB entry 7U2I | 70S ribosome complex with<br>A-site Gly-tRNA <sup>Gly</sup> , P-site<br>fMAC-tRNA <sup>Met</sup> , and CHL<br>PDB entry 7U2J |
|------------------------------------------------------------------------|------------------------------------------------------------------------------------------------------------------------|------------------------------------------------------------------------------------------------------------------------------|------------------------------------------------------------------------------------------------------------------------------|
| <b>Diffraction data</b>                                                |                                                                                                                        |                                                                                                                              |                                                                                                                              |
| Space Group                                                            | P2 <sub>1</sub> 2 <sub>1</sub> 2 <sub>1</sub>                                                                          | P2 <sub>1</sub> 2 <sub>1</sub> 2 <sub>1</sub>                                                                                | P2 <sub>1</sub> 2 <sub>1</sub> 2 <sub>1</sub>                                                                                |
| Unit Cell Dimensions, Å (a x b x c)                                    | 210.61 x 451.44 x<br>624.84                                                                                            | 210.17 x 450.98 x<br>624.13                                                                                                  | 209.93 x 451.24 x<br>622.35                                                                                                  |
| Wavelength, Å                                                          | 0.9792                                                                                                                 | 0.9792                                                                                                                       | 0.9791                                                                                                                       |
| Resolution range (outer shell), Å                                      | 226-2.55<br>(2.62-2.55)                                                                                                | 255.49-2.55<br>(2.62-2.55)                                                                                                   | 174-2.55<br>(2.62-2.55)                                                                                                      |
| I/σ (outer shell)                                                      | 6.93 (0.93)                                                                                                            | 6.19 (0.93)                                                                                                                  | 7.90 (0.89)                                                                                                                  |
| Resolution at which I/σ=1, Å                                           | 2.55                                                                                                                   | 2.55                                                                                                                         | 2.55                                                                                                                         |
| Resolution at which I/σ=2, Å                                           | 2.80                                                                                                                   | 2.80                                                                                                                         | 2.80                                                                                                                         |
| CC(1/2) at which I/σ=1, %                                              | 18.5                                                                                                                   | 18.9                                                                                                                         | 17.1                                                                                                                         |
| CC(1/2) at which I/σ=2, %                                              | 50.0                                                                                                                   | 50.0                                                                                                                         | 50.0                                                                                                                         |
| Completeness (outer shell), %                                          | 99.5 (99.8)                                                                                                            | 99.4 (99.8)                                                                                                                  | 99.5 (100.0)                                                                                                                 |
| R <sub>merge</sub> (outer shell)%                                      | 26.8 (236.4)                                                                                                           | 17.2 (150.6)                                                                                                                 | 16.7 (228.1)                                                                                                                 |
| No. of crystals used                                                   | 2                                                                                                                      | 1                                                                                                                            | 1                                                                                                                            |
| No. of Reflections Used:                                               | 19,099,952<br>1,896,410                                                                                                | 7,719,767<br>1,887,449                                                                                                       | 11,553,376<br>1,882,520                                                                                                      |
| Redundancy (outer shell)                                               | 10.1 (10.1)                                                                                                            | 4.09 (3.96)                                                                                                                  | 6.14 (6.29)                                                                                                                  |
| <b>Refinement</b>                                                      |                                                                                                                        |                                                                                                                              |                                                                                                                              |
| Resolution range of the diffraction data included in the refinement, Å | 146-2.55                                                                                                               | 154-2.55                                                                                                                     | 125-2.55                                                                                                                     |
| R <sub>work</sub> /R <sub>free</sub> , %                               | 21.4/26.2                                                                                                              | 21.7/26.7                                                                                                                    | 20.7/25.5                                                                                                                    |
| <b>No. of Non-Hydrogen Atoms</b>                                       |                                                                                                                        |                                                                                                                              |                                                                                                                              |
| RNA                                                                    | 200,527                                                                                                                | 200,527                                                                                                                      | 200,507                                                                                                                      |
| Protein                                                                | 90,976                                                                                                                 | 90,976                                                                                                                       | 90,998                                                                                                                       |
| Ions (Mg, K, Zn, Fe)                                                   | 2,850                                                                                                                  | 2,850                                                                                                                        | 2,851                                                                                                                        |
| Waters                                                                 | 5,045                                                                                                                  | 5,045                                                                                                                        | 5,042                                                                                                                        |
| <b>Ramachandran Plot</b>                                               |                                                                                                                        |                                                                                                                              |                                                                                                                              |
| Favored regions, %                                                     | 91.32                                                                                                                  | 91.25                                                                                                                        | 91.20                                                                                                                        |
| Allowed regions, %                                                     | 8.47                                                                                                                   | 8.48                                                                                                                         | 8.58                                                                                                                         |
| Outliers, %                                                            | 0.21                                                                                                                   | 0.26                                                                                                                         | 0.22                                                                                                                         |
| <b>Deviations from ideal values (RMSD)</b>                             |                                                                                                                        |                                                                                                                              |                                                                                                                              |
| Bond, Å                                                                | 0.008                                                                                                                  | 0.008                                                                                                                        | 0.009                                                                                                                        |
| Angle, degrees                                                         | 1.408                                                                                                                  | 1.410                                                                                                                        | 1.454                                                                                                                        |
| Chirality                                                              | 0.058                                                                                                                  | 0.058                                                                                                                        | 0.059                                                                                                                        |
| Planarity                                                              | 0.007                                                                                                                  | 0.007                                                                                                                        | 0.008                                                                                                                        |
| Dihedral, degrees                                                      | 17.305                                                                                                                 | 17.457                                                                                                                       | 17.408                                                                                                                       |
| Average B-factor (overall), Å <sup>2</sup>                             | 57.7                                                                                                                   | 61.7                                                                                                                         | 70.9                                                                                                                         |

## II. SUPPLEMENTARY FIGURES

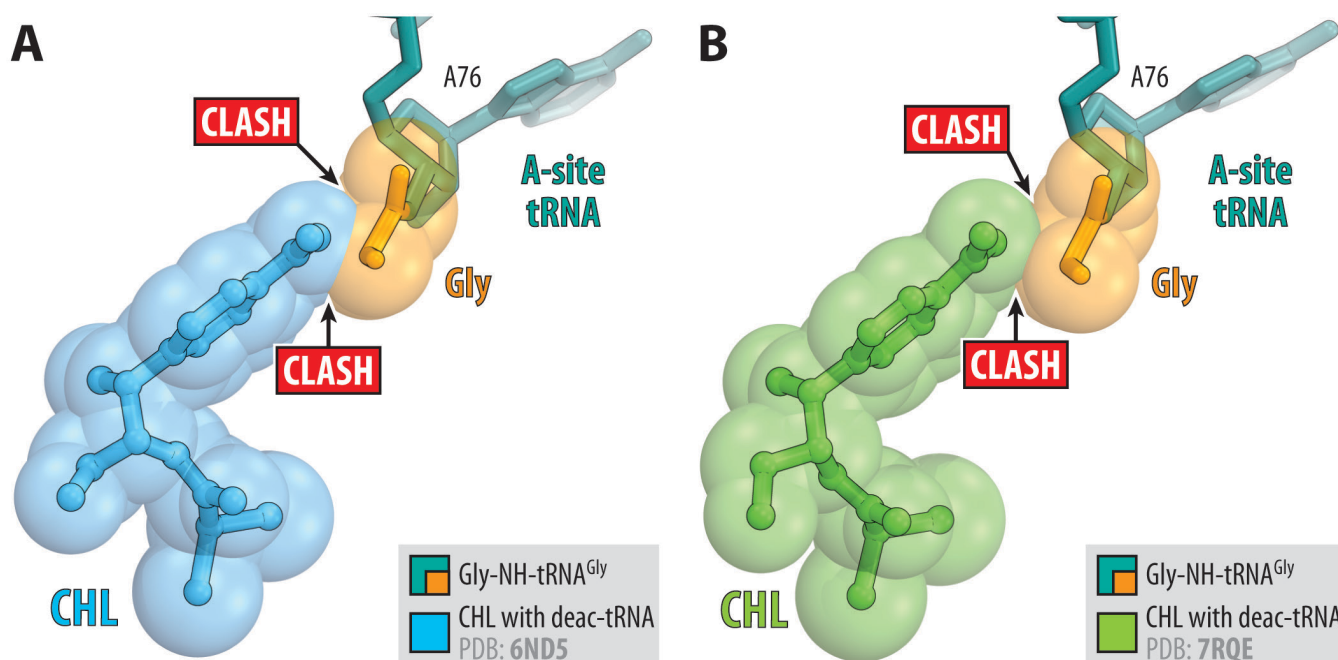

**Figure S1. Alignments of the glycyl-tRNA structure with those of the ribosome-bound CHL. (A, B)** Superpositioning of the 70S ribosome structure carrying Gly-NH-tRNA<sup>Gly</sup> (teal with glycyl moiety highlighted in orange) and fMet-NH-tRNA<sub>i</sub><sup>Met</sup> (omitted for clarity) in the A and P sites, respectively, with the previously reported structures of ribosome-bound CHL in the presence of full-length deacylated tRNAs in both A and P sites (A, PDB entry 6ND5 (1)) or short deacylated A-site tRNA and P-site peptidyl-tRNA analogs (B, PDB entry 7RQE (2)). All structures were aligned based on domain V of the 23S rRNA. Note a clash between the main-chain C $\alpha$  atom of the glycine residue and the nitrobenzyl moiety of CHL.

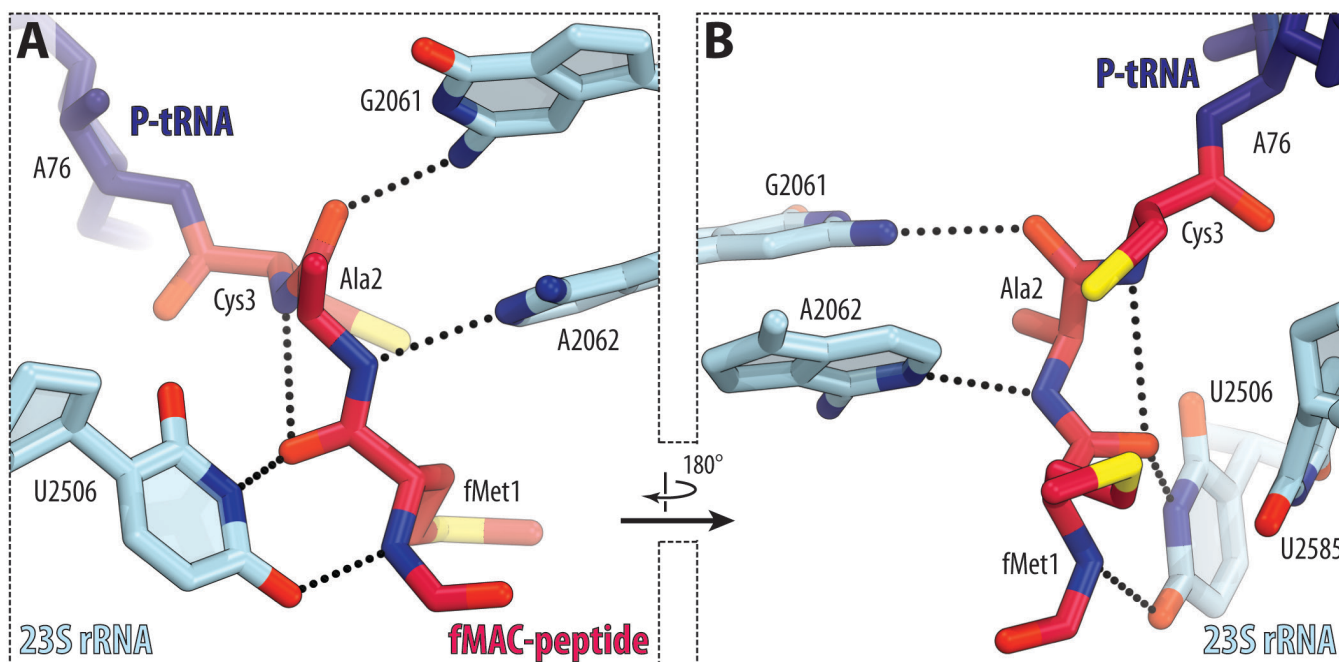

**Figure S2. Tight coordination of the fMAC-peptidyl-tRNA in the nascent peptide exit tunnel. (A, B)** Close-up views of the interactions between the ribosome-bound fMAC-peptidyl-tRNA (navy with peptidyl moiety highlighted in crimson) and the nucleotides of the 23S rRNA (light blue). H-bonds are shown by black dotted lines. Nitrogen atoms are shown in blue, oxygens are red, and sulfurs are yellow.

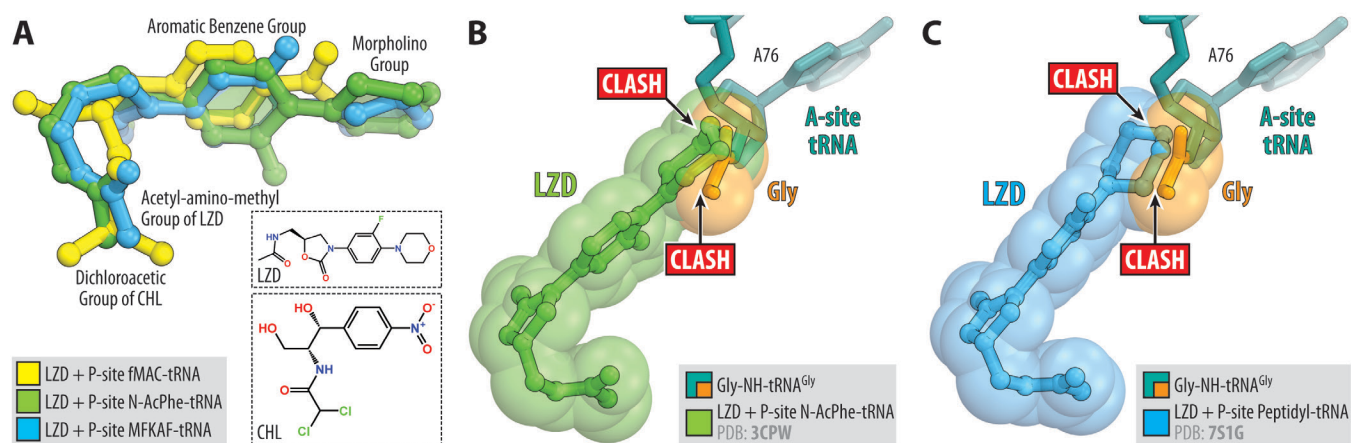

**Figure S3. Alignment of the glycyl-tRNA structure with those of the ribosome-bound LZD.** (A) Superposition of the new structure of CHL (yellow) with the previous structures of ribosome-bound LZD in the presence of P-site N-AcPhe-tRNA analog (green, PDB entry 3CPW (3)) or full-length P-site MFKAF-peptidyl-tRNA (blue, PDB entry 7S1G (4)). All structures were aligned based on domain V of the 23S rRNA. Note that the aromatic rings of these two chemically unrelated drug molecules superimpose well with each other. (B, C) Superpositions of the 70S ribosome structure carrying Gly-NH-tRNA<sup>Gly</sup> (teal with glycyl moiety highlighted in orange) and fMet-NH-tRNA<sub>i</sub><sup>Met</sup> (omitted for clarity) in the A and P sites, respectively, with the previous structures of ribosome-bound LZD shown in panel A. Note a prominent clash between the main-chain atoms of the glycine residue (as well as the ribose of A76 nucleotide) and the morpholino moiety of LZD.

### III. SUPPLEMENTARY REFERENCES

1. Svetlov, M.S., Plessa, E., Chen, C.W., Bougas, A., Krokidis, M.G., Dinos, G.P. and Polikanov, Y.S. (2019) High-resolution crystal structures of ribosome-bound chloramphenicol and erythromycin provide the ultimate basis for their competition. *RNA*, **25**, 600-606.
2. Syroegin, E.A., Flemmich, L., Klepacki, D., Vazquez-Laslop, N., Micura, R. and Polikanov, Y.S. (2022) Structural basis for the context-specific action of the classic peptidyl transferase inhibitor chloramphenicol. *Nat. Struct. Mol. Biol.*, **29**, 152-161.
3. Ippolito, J.A., Kanyo, Z.F., Wang, D., Franceschi, F.J., Moore, P.B., Steitz, T.A. and Duffy, E.M. (2008) Crystal structure of the oxazolidinone antibiotic linezolid bound to the 50S ribosomal subunit. *J. Med. Chem.*, **51**, 3353-3356.
4. Tsai, K., Stojković, V., Lee, D.J., Young, I.D., Szal, T., Vazquez-Laslop, N., Mankin, A.S., Fraser, J.S. and Fujimori, D.G. (2022) Structural basis for context-specific inhibition of translation by oxazolidinone antibiotics. *Nat. Struct. Mol. Biol.*
